# Supplementary material for: Parthenolide Phytosomes Attenuated Gentamicin-Induced Nephrotoxicity in Rats via Activation of Sirt-1, Nrf2, OH-1, and NQO1 Axis
Source: MDPI journal article supplement (doi:10.3390/molecules28062741), 2023-03-17
Supplement: s1 [file s1]

*Supplementary Materials*

**Table S1. List of primers used for RT-PCR.**

|                | Forward Primer         | Reverse Primer          | Accession Number |
|----------------|------------------------|-------------------------|------------------|
| Bax            | 5'CCTGAGCTGACCTTGGAGCA | 5'GGTGGTTGCCCTTTTCTACT  | U32098.1         |
| Bcl2           | 5'TGATAACCGGGAGATCGTGA | 5'AAAGCACATCCAATAAAAAGC | NM_016993.1      |
| $\beta$ -Actin | 5'TCCGTCGCCGGTCCACACCC | 5'TCACCAACTGGGACGATATG  | NM_031144.3      |

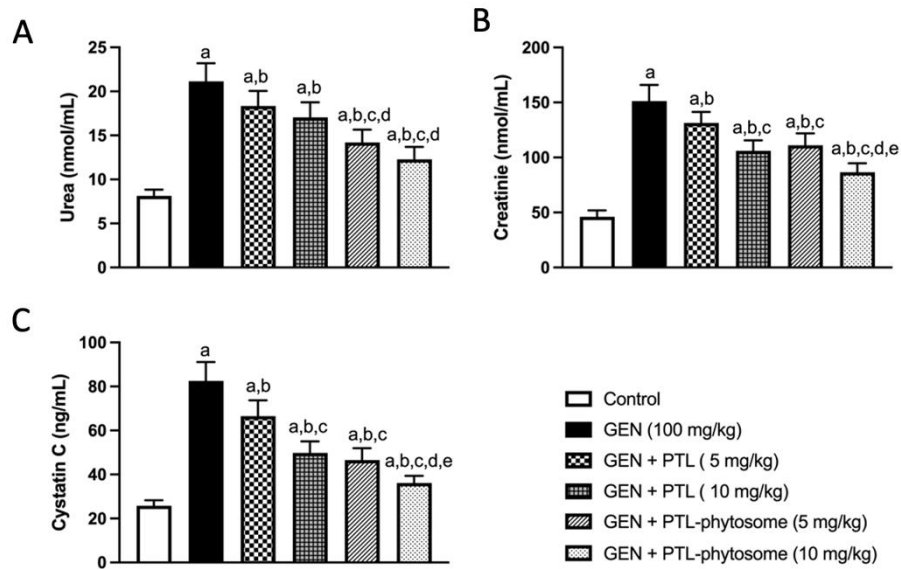

**Figure S1. The protective effects of PTL and PTL-phytosome on the kidney function markers.** Serum levels of kidney function markers, including (A) urea, (B) creatinine, and (C) cystatin C, were elevated in GEN-treated rats while decreased in both PTL and PTL-phytosomes co-treated rats. However, PTL- pyrosomes-cotreated rats (5 or 10 mg/kg) showed a significant reduction in the serum levels of kidney function markers compared to the PTL-cotreated group (5 or 10 mg/kg). Data are expressed as Mean  $\pm$  SD (n = 6). a: significant when compared to control at  $p < 0.05$ ; b: significant when compared to GEN-alone at  $p < 0.05$ ; c: significant when compared to GEN + PTL (5 mg/kg) at  $p < 0.05$ ; d: significant when compared to GEN + PTL (10 mg/kg) at  $p < 0.05$ ; e: significant when compared to GEN + PTL-phytosomes (5 mg/kg) at  $p < 0.05$ .
